# Supplementary material for: Mediation model with a categorical exposure and a censored mediator with application to a genetic study
Source: PLoS One. 2021 Oct 12;16(10):e0257628. doi: 10.1371/journal.pone.0257628 (PMC8509986; doi:10.1371/journal.pone.0257628)
Supplement: S4 Table — Means and standard errors of estimated coefficients for different paths, indirect effects (IEs) and proportions of the total effect mediated (PMs); and coverage probabilities of the 95% confidence intervals for the estimations of IE and PM, obtained based on 500 replicates, each with 1000 samples, given the minor allele frequency (MAF) = 0.5. Different scenarios were considered based on different values of a, b, and censoring percentage (CP), with a0 = 6, b0 = 1, and c~=0.5. (XLSX) [file pone.0257628.s004.xlsx]

## Sheet: Sheet1
S4 Table. Continuous outcome: simulation results given the minor allele frequency (MAF) = 0.5
			Theoretical	Theoretical			Estimated Parameters								Estimated Mediating Effects
Scenario	a	b	IE	PM	CP		a0 (se)	a1 (se)	a2 (se)	b0 (se)	b (se)	(se)	(se)		IE (se)	95% cov	PM (se)	95% cov
Without IE
1	0	0	0	0	0.210308		5.9960 (0.069)	0.0019 (0.087)	0.0040 (0.098)	1.0043 (0.193)	-0.0004 (0.031)	0.4961 (0.075)	0.9973 (0.091)		-0.0001 (0.003)	1.000	-	-
2	0	0	0	0	0.39954		5.9953 (0.083)	0.0022 (0.104)	0.0031 (0.122)	1.0091 (0.239)	-0.0015 (0.038)	0.5009 (0.078)	1.0039 (0.087)		-0.0001 (0.004)	1.000	-	-
3	0	0.4	0	0	0.21034		6.0022 (0.069)	-0.0002 (0.083)	0.0008 (0.097)	1.0099 (0.216)	0.3988 (0.034)	0.4968 (0.078)	0.9945 (0.088)		0.0002 (0.031)	0.956	-	-
4	0	0.4	0	0	0.39968		5.9937 (0.084)	0.0043 (0.105)	0.0068 (0.125)	0.9857 (0.240)	0.4020 (0.039)	0.5009 (0.079)	1.0026 (0.094)		0.0019 (0.041)	0.946	-	-
5	0.4	0	6.43282e-11	9.64924e-11	0.209544		6.0021 (0.068)	0.3960 (0.085)	0.8028 (0.098)	0.9963 (0.211)	0.0001 (0.034)	0.5018 (0.080)	1.0062 (0.093)		0.0002 (0.018)	0.954	-	-
6	0.4	0	6.43282e-11	9.64924e-11	0.402084		6.0025 (0.079)	0.4003 (0.098)	0.7920 (0.117)	1.0087 (0.225)	-0.0009 (0.036)	0.4943 (0.079)	1.0015 (0.090)		-0.0008 (0.019)	0.962	-	-
With IE
7	0.4	0.4	0.213333	0.242424	0.210086		5.9947 (0.068)	0.4040 (0.087)	0.8027 (0.102)	1.0022 (0.219)	0.4001 (0.035)	0.4960 (0.080)	0.9977 (0.092)		0.2148 (0.038)	0.948	0.2451 (0.040)	0.954
8	0.4	0.4	0.213333	0.242424	0.399598		5.9992 (0.082)	0.3997 (0.099)	0.7928 (0.123)	0.9791 (0.223)	0.4031 (0.037)	0.5026 (0.083)	0.9950 (0.100)		0.2138 (0.043)	0.936	0.2438 (0.049)	0.926
Abbreviations: IE, indirect effect; PM: proportions of the total effect mediated; CP, censoring percentage; se, standard error; cov, coverage probability
